# Supplementary material for: Mobile platform for rapid sub–picogram-per-milliliter, multiplexed, digital droplet detection of proteins
Source: PubMed Central journal article supplement — Proc Natl Acad Sci U S A. 2019 Feb 14;116(10):4489–95. doi: 10.1073/pnas.1814110116 (PMC6410864; doi:10.1073/pnas.1814110116), 2019-02-14
Supplement: pnas.1814110116.sapp.pdf [file pnas.1814110116.sapp.pdf]

1

## 2 **Supplementary Information for**

### 3 **Mobile platform for rapid sub-picogram-per-milliliter, multiplexed, digital droplet detection of** 4 **proteins**

5 **Venkata Yelleswarapu, Joshua R Buser, Margalit Haber, Jonathan Baron, Eshwar Inapuri, and David Issadore**

6 **David Issadore.**

7 **E-mail: [daveissadore@gmail.com](mailto:daveissadore@gmail.com)**

#### 8 **This PDF file includes:**

- 9     Supplementary text
- 10    Figs. S1 to S3
- 11    Table S1
- 12    Caption for Movie S1
- 13    References for SI reference citations

#### 14 **Other supplementary materials for this manuscript include the following:**

- 15     Movie S1

**Table S1. Technologies to perform digital ELISA assays**

| Ref.                         | Target                | LOD                                      | Volume  | Compartments               | Device material                          | Multiplex Capability                | Readout Equipment       | Method of Detection                                                                                                               |
|------------------------------|-----------------------|------------------------------------------|---------|----------------------------|------------------------------------------|-------------------------------------|-------------------------|-----------------------------------------------------------------------------------------------------------------------------------|
| <b>Single Enzyme Studies</b> |                       |                                          |         |                            |                                          |                                     |                         |                                                                                                                                   |
| (1)                          | $\beta$ -Gal          | 0.88 $\mu$ M                             | 4.2 pL  | 200k                       | PDMS                                     | Green only                          | Fluorescence Microscope | -Single $\beta$ -Gal in droplets<br>-Measured rate of fluorescence production                                                     |
| (2)                          | ALP/<br>$\beta$ -Gal  | 7.0 fM                                   | 44 fL   | 7600*120 chamber           | CYTOP on glass coverslip                 | Green<br>Orange                     | Fluorescence Microscope | -Noted only 2.5% of the substrate was consumed in 20 min                                                                          |
| <b>Biological Targets</b>    |                       |                                          |         |                            |                                          |                                     |                         |                                                                                                                                   |
| (3)                          | TNF- $\alpha$ and PSA | 6 fg/mL (200aM)                          | 50 fL   | 50k well                   | Glass wells<br>Silicone gasket/oil       | Singleplex                          | Fluorescence Microscope | Microarray with bead-based dELISA                                                                                                 |
| (4)                          | P24                   | 100 vir/mL                               | 50 fL   | comp                       | Simoa array                              | Multiplex Capability                | Fluorescence Microscope | Measured number of p24 proteins<br>-Converted to virion count by dividing 2000 p24 proteins/virion<br>Verified with RNA extracted |
| (5)                          | PSA                   | 1.2 pg/mL (43 fM)                        | 32 fL   | 20k drops                  | PDMS<br>Glass                            | Demonstrated Singleplex             | Fluorescence Microscope | -Static array with around 20k droplets analyzed<br>-Low dynamic range<br>-No false positives reported                             |
| (6)                          | Flu                   | 4 fM in buffer                           | 38 fL   | 62.5k wells                | Patterned Teflon-Af on glass slides      | Multiplex Capability                | Fluorescence Microscope | -Detected nucleoprotein from flu virus in nasopharyngeal swabs to show dELISA in clinical sample.                                 |
| (7-9)                        | Commercial assays     | 3.8 fg/mL (200 aM)<br>IL-10              | 40 fL   | 216k wells<br>25-50k beads | Cyclic Olefin Polymer<br>Bluray Printing | Multiplex (6-plex<br>66 samples/h)  | Fluorescence Microscope | -Fully automated commercial digital ELISA from Quanterix Simoa HD-1 Analyzer                                                      |
| <b>This</b>                  | GM-CSF<br>IL6         | 3.7 fg/mL (300 aM)<br>7.0 fg/mL (350 aM) | 22.5 pL | 10M droplets<br>1M beads   | PDMS and Glass<br>3D stack               | Multiplex (Duplex<br>Samples/5 min) | Cell Phone Camera       | -Integrated mobile platform with parallelized droplet generation and detection with cloud computing                               |

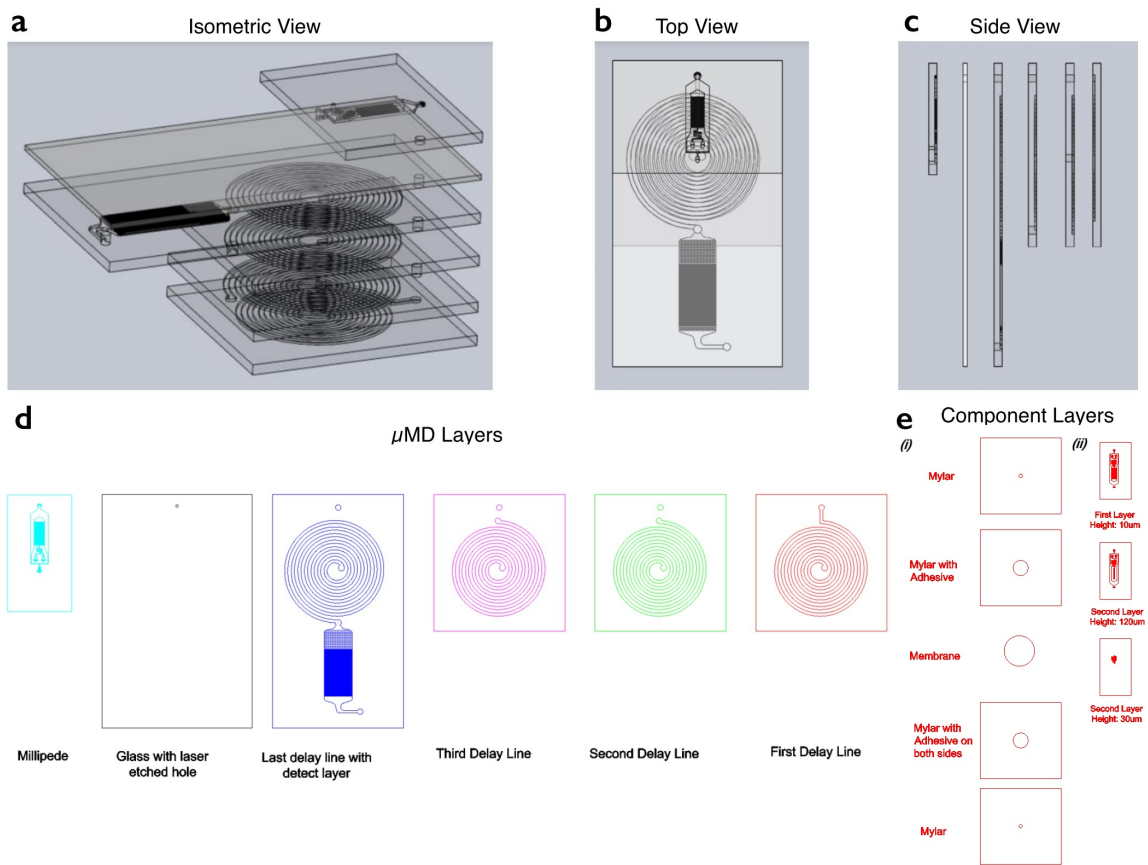

**Figure S1. 3D design of chip.** a-c. Isometric and side views of the  $\mu$ MD display how the modular components are stacked in a 3d chip. d. Draftsight drawings of each layer of the  $\mu$ MD, followed by component layers for the bead processor (e,i) and the droplet generator (e,ii).

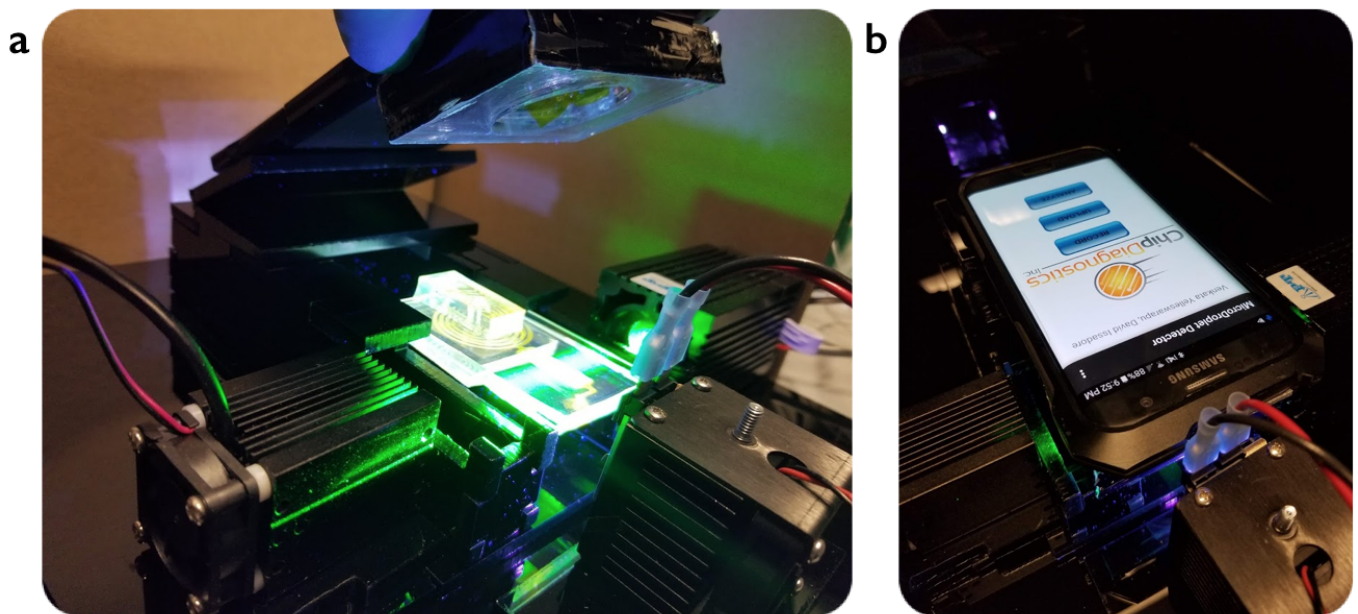

**Figure S2. Design of  $\mu$ MD casing. a,b.** The  $\mu$ MD consists of a disposable microfluidic chip, a cell phone, and an acrylic casing that we designed. The acrylic casing comes in two parts: one that is attached to the cell phone to fix the distance between the imaging plane and the macro lens, and the second which houses the LEDs and locks the cell phone into position when the disposable chip is inserted.

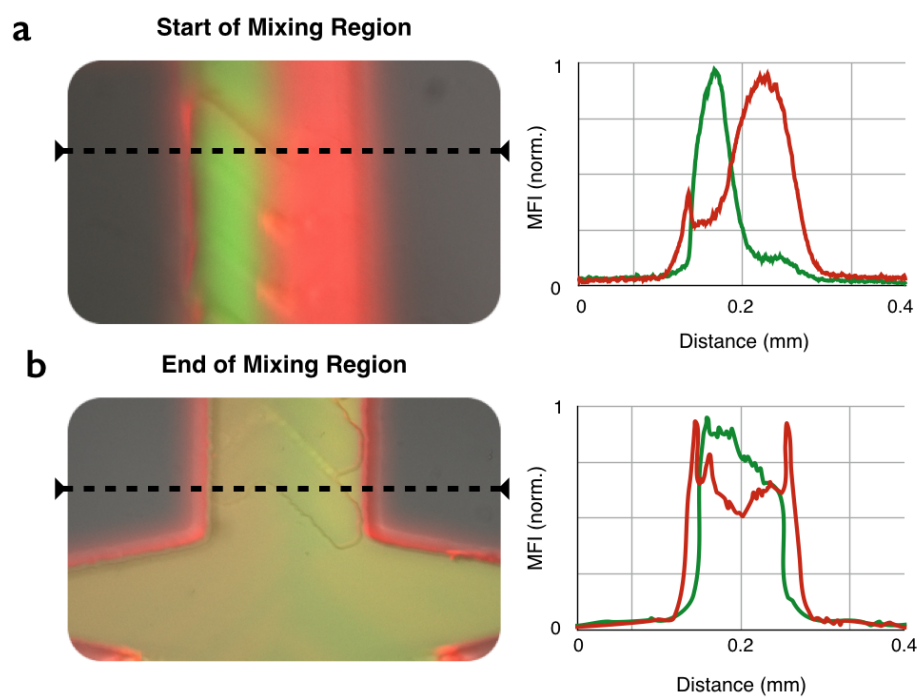

**Figure S3. Mixing of aqueous phases.** A channel length of 14 mm is used to ensure proper mixing of the beads and the substrate, while minimizing background signal that comes from enzymes generating fluorescence signal before they are encapsulated into droplets.

16 **Movie S1. The video demonstrates the workflow of the droplet digital assay, as well as features of the robust**  
17 **droplet generation and detection.**

## 18 **Supporting Information Text**

19 **dELISA Assay.** On our chip, the bead processing, droplet generation, droplet incubation, and detection are integrated. By  
20 avoiding manual processing steps, loss, contamination, and unreliable reinjection of droplets after incubation, as has been  
21 observed in similar systems(10), can be avoided. To functionalize the microbeads used in our assay, we first washed both the 5.4  
22  $\mu\text{m}$  Carboxyl Green [High Intensity Yellow] Particles (CFH-5052-2; Spherotech) and 4.5  $\mu\text{m}$  Carboxyl UV beads (CFP-4041-2;  
23 Spherotech) 6 times each, using centrifugation at 15k rcf for 5 min to remove the sodium azide, which inhibits HRP, from the  
24 supernatant. Subsequently, we used the PolyLink Protein Coupling Kit (24350-1; PolySciences) to attach anti-human GM-CSF  
25 (MAB2172; R&D) and anti-human IL-6 (MAB206; R&D) antibodies onto the beads, respectively. To evaluate our device,  
26 we created serial dilutions of the protein targets (#215-GM-010, #206-IL-010; R&D) in low protein binding tubes to reduce  
27 protein binding to the surface.

28 The on-chip bead processing steps were carried out as follows. The input to the device is 1:4 diluted serum, diluted in T20  
29 buffer. Incubation with the beads is performed in a total volume of 100  $\mu\text{L}$  T20 buffer and protein sample. Reagents are stored  
30 off-chip in this study, but can be preloaded on-chip in future device generations. The reagents for the HRP substrate are  
31 prepared immediately before the assay to reduce the background of the fluorescence substrate. The reagents can be loaded  
32 into a pre-loaded tubing and dispensed using a peristaltic pump. On the on-chip membrane, which captures the beads for  
33 processing, the following steps are carried out. Following the initial incubation, the beads are washed and then incubated with  
34 0.7 nM concentration of detection antibody in T20 buffer. After an hour of incubation, the sample is washed and replaced  
35 with 12.5 pM concentration of HsHRP in T20 Buffer (Life Technologies), and washed again. Subsequently, the flow is reversed  
36 so that beads are released and the output is encapsulated into droplets for analysis. For droplet generation, the continuous  
37 phase is Biorad Oil. Droplets of diameter  $d = 40 \mu\text{m}$  ( $\text{CV} = 5.3\%$ ) are generated with the total dispersed phase fixed at  $\phi_d$   
38  $= 12 \text{ ml/hr}$  with a fixed continuous phase of  $\phi_c = 55 \text{ ml/hr}$ . QuantaRed™ Enhanced Chemifluorescent HRP Substrate Kit  
39 was mixed with the microbeads in the on-chip vortex mixer (**Fig. 2a, SI Appendix, Fig. S3**) immediately upstream of  
40 the droplet generator. The substrate is introduced at a flow rate of 6 ml/hr. We selected QX200 Droplet Generation Oil for  
41 EvaGreen (Biorad) to encapsulate the beads in stable droplets with minimal dye leakage. The  $\mu\text{MD}$  uses high fluorescence  
42 intensity dye beads, and HRP substrate compared to the low intensity dye beads, the  $\beta$ -gal enzyme, and RGP substrate found  
43 in Simoa's technology.(3, 8)

44 When performing the bead-processing off-chip, we used the following protocol. Capture beads are added into sample in low  
45 protein binding tubes, and incubated for an hour. The sample is diluted into 1mL with T20 Buffer and centrifuged at 12k  
46 rcf to remove background cell debris and nontarget molecules in the supernatant. The beads are resuspended into 0.7 nM  
47 concentration of detection antibody in T20 buffer and incubated for an hour. This solution is diluted into 1mL T20 Buffer  
48 and centrifuged at 12k rcf to remove unbound detection antibody, and 12.5 pM concentration of HsHRP in T20 Buffer. This  
49 sample is washed 4 times using a centrifuge and resuspended in T20 Buffer, to remove any HsHRP that could result in a false  
50 positive. The resulting sample is then introduced as the aqueous inlet for the droplet generating device. For measuring samples  
51 spiked into FBS or PBS, we performed the incubation off-chip and all subsequent processing steps on-chip. We first diluted the  
52 serum 1:4 in T20 buffer. Incubation with the beads was performed in a total volume of 100 L T20 buffer and protein sample to  
53 reduce nonspecific binding, and placed on an end-to-end mixer for an hour to prevent sedimentation.

54 To calculate the limit of detection (LOD) and limit of quantification (LOQ), we measured the number of false positives in  
55 replicate ( $N = 3$ ) "blank" samples that included FBS but contained no spiked protein. The LOD and LOQ was converted to  
56 units pg/mL using the know molecular weights of the target molecules. The LOD was defined as  $\text{LOD} = \langle \text{FP} \rangle + 2.5\sigma(\text{FP})$ ,  
57 where  $\langle \text{FP} \rangle$  was the mean number of false positives and  $\sigma(\text{FP})$  was the standard deviation of the false positives. The LOQ  
58 was defined as  $\text{LOQ} = \langle \text{FP} \rangle + 10\sigma(\text{FP})$ . We defined these values so that they agree with what is used to describe the gold  
59 standard technology, Quanterix's Simoa. (11, 12)

60 **Design of the Non-Disposable Components of the  $\mu\text{MD}$  and its Software.** The  $\mu\text{MD}$  consists of a disposable microfluidic chip,  
61 a cell phone, and an acrylic casing that we designed.(**SI Appendix, Fig. S1,S2**) The acrylic casing comes in two parts. The  
62 first part is attached to the cell phone and fixes the distance between the imaging plane and the macro lens. The second  
63 part houses the LEDs and the cell phone, and sets the position of the disposable chip relative to the excitation sources and  
64 the camera (**SI Appendix, Vid S1**). This casing contains a low cost commercial plastic lens ( $< \$4$ ), a bandpass filter ( $\lambda_{cwl}$   
65  $= 512 \pm 11.5 \text{ nm}$ ,  $630 \pm 45.5 \text{ nm}$ , #87-241; Edmund Optics), and a slot to automatically align the microfluidic chip. The  
66 disposable microfluidic chip is constructed of only PDMS, glass and mylar, and is prototyped using soft lithography at The  
67 University of Pennsylvania's Singh Center for Nanotechnology. The low cost plastic macro lens (15x magnification, ML-515;  
68 Carson HookUpz) is used to image the device Field of View  $\text{FOV} = 7 \times 12 \text{ mm}^2$ . (**Fig. 3b**) There are three excitation sources,  
69 each mounted in the acrylic casing: an ultra-bright UV LED ( $\lambda_{ex} = 400 \text{ nm}$ , CBT-90-UV-C31-M400-22; Luminus), a fat  
70 beam (laser diameter  $> 10\text{mm}$ ) blue laser diode (450nm, 400mW Laser Diode Module; APT Lighting), and a fat beam green  
71 laser (532nm, 300mW Laser Diode Module; APT Lighting). The light sources are driven using external electronics consisting  
72 of an LED driver circuit (DK-114N-3; Luminus Development Kit) for the LED, TTL modules for the laser diodes, and a  
73 microcontroller (Arduino Mega2560) programmed with unique MLS patterns for each light source. To illuminate the droplets

74 in the microfluidic channels we make use of antiresonant side coupling to achieve uniform illumination(13). The non-disposable  
75 cost, excluding the cell phone, of the  $\mu$ MD prototype is < \$1000.

76 The software used in this study implements the data analysis shown in **Fig. 3**. This software detects multiple fluorescent  
77 colors in each individual droplet, rather than just one, as was done in previous work. (14, 15) A custom App is written that is  
78 installed on a Galaxy S8 phone. This App controls, and coordinates, the multiple components in this experiment, including the  
79 cloud computing, and the cell phone camera. A commercially available App Open Camera is used to interface with the cell  
80 phone's camera, and allows manual control of the camera's settings. Video collected on the phone is uploaded to a Matlab  
81 cloud server (MathWorks Cloud). Optical aberrations in the video are fixed by the software based on a calibration used to  
82 calculate the distortion from the macro lens. Small errors in the position and angle of the chip relative to the camera are also  
83 corrected. The software then parses the frames into 120 individual channels, and carries out the algorithm described in **Fig. 3**.  
84 The data analysis currently takes 10 minutes to analyze 10 million droplets. Data analysis can further be sped up using a GPU  
85 or cloud server, but we currently run the process locally on a Using an Ubuntu OS with an Intel Core i7-7700HQ @ 2.80 GHz x  
86 8 and 16 GB RAM. All source code for the software used in this study is included in the **SI Appendix, SI Text**.

87 **Supplementary Code.** Source code can be found in the following [link](#) to the lab website which contains all of the software with  
88 a readme file to explain how to use each of the components. All code is commented thoroughly for ease of use. Source code is  
89 shared for: (i) Matlab software for image analysis, (ii) Arduino code that modulates the LED excitation, and (iii) an Android  
90 App that connects the software to cloud.

## 91 References

- 92 1. Guan Z, et al. (2014) A highly parallel microfluidic droplet method enabling single-molecule counting for digital enzyme  
93 detection. *Biomicrofluidics* 8(1):014110.
- 94 2. Obayashi Y, et al. (2015) A single-molecule digital enzyme assay using alkaline phosphatase with a coumarin-based  
95 fluorogenic substrate. *The Analyst* 140(15):5065–5073.
- 96 3. Rissin DM, et al. (2010) Single-molecule enzyme-linked immunosorbent assay detects serum proteins at subfemtomolar  
97 concentrations. *Nature Biotechnology* 28(6):595–599.
- 98 4. Chang L, et al. (2013) Simple diffusion-constrained immunoassay for p24 protein with the sensitivity of nucleic acid  
99 amplification for detecting acute HIV infection. *Journal of Virological Methods* 188(1-2):153–160.
- 100 5. Shim Ju, et al. (2013) Ultrarapid Generation of Femtoliter Microfluidic Droplets for Single-Molecule-Counting Immunoassays.  
101 *ACS Nano* 7(7):5955–5964.
- 102 6. Leirs K, et al. (2016) Bioassay Development for Ultrasensitive Detection of Influenza A Nucleoprotein Using Digital ELISA.  
103 *Analytical Chemistry* 88(17):8450–8458.
- 104 7. Wilson DH, et al. (2016) The Simoa HD-1 Analyzer. *Journal of Laboratory Automation* 21(4):533–547.
- 105 8. McGuigan W, et al. (2014) The optics inside an automated single molecule array analyzer, eds. Vo-Dinh T, Mahadevan-  
106 Jansen A, Grundfest WS. p. 89350X.
- 107 9. Kan CW, et al. (2012) Isolation and detection of single molecules on paramagnetic beads using sequential fluid flows in  
108 microfabricated polymer array assemblies.
- 109 10. Zhang Y, Jiang HR (2016) A review on continuous-flow microfluidic PCR in droplets: Advances, challenges and future.  
110 *Analytica Chimica Acta* 914:7–16.
- 111 11. Quanterix (2018) Simoa IL-6 Advantage Kit. *101622 datasheet*.
- 112 12. Quanterix (2017) Simoa Human GM-CSF 2.0. *102329 datasheet*.
- 113 13. Schmidt O, Bassler M, Kiesel P, Knollenberg C, Johnson N (2007) Fluorescence spectrometer-on-a-fluidic-chip. *Lab on a*  
114 *Chip* 7(5):626.
- 115 14. Yelleswarapu V, Issadore D (2017) Multicolor detection of fluorescent droplets on a cell phone using time domain encoded  
116 optofluidics in *2017 IEEE Healthcare Innovations and Point of Care Technologies (HI-POCT)*. (IEEE), pp. 245–248.
- 117 15. Yelleswarapu VR, et al. (2017) Ultra-high throughput detection (1 million droplets per second) of fluorescent droplets  
118 using a cell phone camera and time domain encoded optofluidics. *Lab Chip* 17(6):1083–1094.
